# Supplementary material for: Ecological Status as the Basis for the Holistic Environmental Flow Assessment of a Tropical Highland River in Ethiopia
Source: MDPI journal article supplement (doi:10.3390/w13141913), 2021-07-10
Supplement: s1 [file s1]

**SUPPLEMENT to the article: Ecological foundation of Gumara River and connected wetlands as a basis for a holistic environmental flow assessment in the Lake Tana Basin, Ethiopia**

Wubneh B. Abebe<sup>1,2\*</sup>, Seifu A. Tilahun<sup>2</sup>, Michael M. Moges<sup>2</sup>, Ayalew Wondie<sup>3</sup>, Minychl G. Derseh<sup>2</sup>, Workiye W. Assefa<sup>4</sup>, Demesew A. Mhired<sup>2</sup>, Anwar A. Adem<sup>5</sup>, Fasikaw A. Zimale<sup>2</sup>, Wuletawu Abera<sup>6</sup>, Tammo A. Steenhuis<sup>7</sup>, Michael E. McClain<sup>8</sup>

**1. Macroinvertebrate data collection and processing**

Macroinvertebrate samples were taken following multi-habitat-sampling approach from all 30 sampling sites. They were taken using a D-frame net with mesh size of 500 µm. During sampling, 100-meter representative river stretch of the sampling site was selected and its microhabitat composition was estimated (flow condition as proportion of hydro-morphology of pool, riffle, lotic and lentic and then, cover of mineral substrates, macrophytes, snags, and cover of biotic microhabitats). Then, 20 sample units (jags) were distributed according to the estimated share of habitats, each replicate covering an area of approximately 25 × 25 cm [23]. Stony microhabitats were sampled to a depth of approximately 10 cm, sandy and organic micro-habitats to a depth of approximately 3 cm (Table S1). Macro-invertebrate samples were kept in small plastic container immersed in a 4% formaldehyde. Pooled macro-invertebrate samples were preserved in 4% formaldehyde and transported to the Bahir Dar Fishery Research Centre to identify them into the lowest possible taxa (family in this case) using identification keys with the help of a dissecting microscope [24]. Ecological status of the Gumara river was evaluated using macroinvertebrates biotic scoring. For this purpose macroinvertebrate-based ETHBios scoring methodology developed by Aschalew and Moog [15] was used and supplemented using South African Sensitivity Score (SASS) and Average BMWP Score Per Taxon (ASPT) methods [5]. Moreover, abundance, Shannon Weiner diversity index, richness, evenness calculated for species diversity description of macroinvertebrates. The formula for Shannon diversity index:

$$\text{Shannon Index (H)} = - \sum_{i=1}^s P_i \ln P_i; \quad (1)$$

where,  $P_i$ -the proportion of individuals in the  $i^{\text{th}}$  species and  $s$ -number of individuals in the site.

**2. Land use and land cover classification and analysis**

Land use/cover of Gumara watershed was mapped from 1985 to 2020 to investigate changes that could impact ecosystem services. Random forest algorithm classification provided good results with an overall accuracy of 0.90, kappa coefficient of 0.87 and validation overall accuracy of 1. Cultivated land exceeded by far other cover types since 1985 and farmland covered 114,779 ha (67%) in 1985 and 108,422 ha (63%) in 2020. Cultivated land is the dominant cover during the study period, but its size decreased overtime. This is because of small landholding size; farmers tend to change their farmland to eucalyptus plantation. Study confirms that eucalyptus fuelwood is much more profitable than field crops [43-45]. Thus, the vegetation cover increased from 6809 ha in 1985 to 19824.1 ha in 2020 in the study watershed (figure S7).

**3. Tables and figures**

**Table S1.** Sampling Sites in the Gumara river and Shesher wetland. LR – lower reach, MR – middle reach, UR- upper reach. \* fish sampling sites.

| S.N. | SITE (ID) | SITE_NAME     | S.N. | SITE       | SITE_NAME | S.N. | SITE      | SITE_NAME       |
|------|-----------|---------------|------|------------|-----------|------|-----------|-----------------|
| 1    | LR00 (0)  | Guanta lower  | 11   | LR10* (10) | Wanzaye   | 21   | MR08* (8) | Aba Gunda       |
| 2    | LR01 (1)  | Kizin lower   | 12   | LR12* (12) | Gava      | 22   | UR00 (0)  | GenaMechawechea |
| 3    | LR02 (2)  | Wonzema lower | 13   | MR00* (0)  | Fuafuat   | 23   | UR01 (1)  | Sendie meder    |

|    |           |               |    |           |              |    |          |                  |
|----|-----------|---------------|----|-----------|--------------|----|----------|------------------|
| 4  | LR03 (3)  | Kizin upper   | 14 | MR01 (1)  | Walbo        | 24 | UR02 (2) | Tosign Ber       |
| 5  | LR04 (4)  | Guanta upper  | 15 | MR02* (2) | Menekuzer    | 25 | UR03 (3) | Lewaye           |
| 6  | LR05* (5) | Gumara bridge | 16 | MR03 (3)  | Nifara       | 26 | UR04 (4) | Debretabor town  |
| 7  | LR06* (6) | Shesher 01    | 17 | MR04 (4)  | Fogeda river | 27 | UR05 (5) | Bilando          |
| 8  | LR07* (7) | Shesher 02    | 18 | MR05* (5) | Ras amba     | 28 | UR06 (6) | Sensawuha        |
| 9  | LR08 (8)  | Woreta town   | 19 | MR06 (6)  | Gebetit      | 29 | UR07 (7) | Kosterwuha       |
| 10 | LR09* (9) | Gumara mouth  | 20 | MR07* (7) | Chan river   | 30 | UR08 (8) | Shimagle Giorgis |

Table S2. Hydromorphological condition of sampling sites in Gumara river and Shesher wetland. For the location of the sites see Figure 1, main text.

| S.N | SITE | HYDROMORPHOLOGY                 | HABITAT TYPE; (HYDRMORPHOLOGYPERCENT, ABIOTIC_VS_BIOTIC)                                                                |
|-----|------|---------------------------------|-------------------------------------------------------------------------------------------------------------------------|
| 1   | LR00 | 100% pool, dammed               | pool100, Psammo-pelal_Vs_LPTP100                                                                                        |
| 2   | LR01 | 40% pool, 60% riffle            | Pool40, Mesolithal_Vs_MA10&SMA15&EMP15; Riffle60, macrolithal_Vs_EMP60                                                  |
| 3   | LR02 | 40% pool, 60% riffle            | Pool40, microlithal_Vs_CPOM40; Riffle60, macrolithal_Vs_MA50&EMP10                                                      |
| 4   | LR03 | 60% pool, 40% riffle            | Pool60, mesolithal_Vs_MA30&SMP30; riffle40, macrolithal_Vs_EMP40                                                        |
| 5   | LR04 | 90% pool, 10% Riffle            | Pool90, Argyllal_Vs_MA30&SMP30&EMP30; Riffle10, microlithal_Vs_EMP10                                                    |
| 6   | LR05 | 100% pool                       | Pool100, Pelal_Vs_BM100                                                                                                 |
| 7   | LR06 | 100% pool                       | Pool100, Pelal_Vs_MIA100                                                                                                |
| 8   | LR07 | 100% pool                       | Pool100, Pelal_Vs_MIA100                                                                                                |
| 9   | LR08 | 95% pool, 5% lotic              | Pool95, Pelal_Vs_MA95; Lotic5, Psammo-pelal_Vs_BM5                                                                      |
| 10  | LR09 | 100% pool                       | Pool100, psammo-pelal_Vs_BM20&EMP80                                                                                     |
| 11  | LR10 | 80% pool, 10% riffle, 10% lotic | Pool80, pelal_Vs_BM80; Riffle10, macrolithal_Vs_BM10; lotic10, macrolithal_Vs_MIA10                                     |
| 12  | LR12 | 100% pool                       | Pool100, pelal_Vs_BM90&xylal10                                                                                          |
| 13  | MR00 | 90% pool, 10% riffle            | Pool90, pelal_Vs_BM45&EMP45; riffle10, akal_Vs_BM10                                                                     |
| 14  | MR01 | 80% pool, 20% riffle            | Pool80, megalithal_Vs_LPTP80; Riffle20, megalithal_Vs_EMP20                                                             |
| 15  | MR02 | 100% pool                       | Pool100, pelal_Vs_BM100                                                                                                 |
| 16  | MR03 | 100% pool                       | Pool100, megalithal_Vs_LPTP80&psammal_Vs_LPTP20                                                                         |
| 17  | MR04 | 60% pool, 30% riffle, 10% lotic | Pool60, megalithal_Vs_BM20&psammal_Vs_BM20&psammal_Vs_EMP20; Riffle30, mesolithal_Vs_MA30; Lotic10, microlithal_Vs_BM10 |
| 18  | MR05 | 80% pool, 20% riffle            | Pool80, megalithal_Vs_BM70&EMP10; Riffle20, psammal-pelal_Vs_BM20                                                       |
| 19  | MR06 | 80% pool, 20% lotic             | Pool80, pelal_Vs_BM80; lotic20, megalithal_Vs_BM20                                                                      |
| 20  | MR07 | 40% pool, 60% lotic             | Pool40, microlithal_Vs_BM40; lotic60, mesolithal_Vs_BM60                                                                |
| 21  | MR08 | 100% pool                       | Pool100, pela_Vs_BM100                                                                                                  |
| 22  | UR00 | 50% pool, 50% riffle            | Pool50, megalithal_Vs_BM25&pelal_Vs_BM25; Riffle50, macrolithal_Vs_BM50                                                 |
| 23  | UR01 | 40% pool, 60% riffle            | Pool40, microlithal_Vs_BM40; Riffle60, macrolithal_Vs_BM60                                                              |
| 24  | UR02 | 40% pool, 60% riffle            | Pool40, megalithal_Vs_MIA40; Riffle60, megalithal_Vs_CPOM60                                                             |
| 25  | UR03 | 100% pool                       | Pool100, macrolithal_Vs_BM10&mesolithal_Vs_BM20&microlithal_Vs_BM20&akal_Vs_BM20&                                       |

|    |      |                      |                                                                     |
|----|------|----------------------|---------------------------------------------------------------------|
|    |      |                      | psammal_Vs_BM10&psammal-pelal_Vs_BM20                               |
| 26 | UR04 | 20% pool, 80% riffle | Pool20, mesolithal_Vs_MA20; Riffle80, macrolithal_Vs_MA80           |
| 27 | UR05 | 50% pool, 50% lotic  | Pool50, mesolithal_Vs_MA20&SMP10&EMP20;<br>lotic50, psammal_vs_BM50 |
| 28 | UR07 | 80% pool, 20% riffle | Pool80, microlithal_Vs_BM80; Riffle20, mesolithal_Vs_BM20           |
| 29 | UR06 | 80% pool, 20% riffle | Pool80, mesolithal_Vs_BM80; Riffle20, macrolithal_Vs_BM20           |
| 30 | UR08 | 100% pool            | Pool100, pelal_Vs_EMP20&Argylal_Vs_MA20&EMP60                       |

\*LPTP- living parts of terrestrial plant, MA-macro algae; MI-micro algae, SMA-submerged macrophyte, EMP-Emergent macrophyte, CPOM-course particulate organic matter, FPOM-Fine particulate organic matter, Xylal-dead wood, BM-Bare mineral.

**Table S3.** Average Daily Flow ( $\text{m}^3\text{s}^{-1}$ ) of the 30 sampling sites in March 2016 and 2020 with their category in flow exceedance from the highest historical minimum value, Q80. Q80- the 80<sup>th</sup> percentile flow; FDC - flow duration curve, LR- lower reach, MR – middle reach, UR – upper reach, Rch – reach, Lo – lower, Up – upper, Lf – low flow; Mhf – Moderate/high flow.

| Site | Highest<br>Threshold<br>Minimum<br>Flow On<br>FDC, Q <sub>80</sub> | Average<br>Flow,<br>March 2016 | Category,<br>2016 | Average<br>Flow, March<br>2020 | Category,<br>2020 |
|------|--------------------------------------------------------------------|--------------------------------|-------------------|--------------------------------|-------------------|
| LR00 | 0.019                                                              | 0.016                          | Lf                | 0.033                          | Mhf               |
| LR01 | 0.005                                                              | 0.004                          | Lf                | 0.007                          | Mhf               |
| LR10 | 1.81                                                               | 1.657                          | Lf                | 3.111                          | Mhf               |
| LR12 | 6.090                                                              | 3.994                          | Lf                | 5.509                          | Mhf               |
| LR02 | 0.002                                                              | 0.002                          | Lf                | 0.003                          | Mhf               |
| LR03 | 0.002                                                              | 0.002                          | Lf                | 0.004                          | Mhf               |
| LR04 | 0.000                                                              | 0.000                          | Lf                | 0.001                          | Mhf               |
| LR05 | 6.084                                                              | 2.392                          | Lf                | 4.270                          | Mhf               |
| LR06 | 0                                                                  | 0.002                          | Mhf               | 0.006                          | Mhf               |
| LR07 | 0.006                                                              | 0.004                          | Lf                | 0.008                          | Mhf               |
| LR08 | 0                                                                  | 0.001                          | Mhf               | 0.003                          | Mhf               |
| LR09 | 6.184                                                              | 4.318                          | Lf                | 6.819                          | Mhf               |
| MR00 | 0.283                                                              | 0.183                          | Lf                | 0.354                          | Mhf               |
| MR01 | 1.51                                                               | 1.106                          | Lf                | 2.172                          | Mhf               |
| MR02 | 1.24                                                               | 0.747                          | Lf                | 1.496                          | Mhf               |
| MR03 | 0.001                                                              | 0.001                          | Lf                | 0.002                          | Mhf               |
| MR04 | 0.023                                                              | 0.014                          | Lf                | 0.027                          | Mhf               |
| MR05 | 0.137                                                              | 0.089                          | Lf                | 0.171                          | Mhf               |
| MR06 | 0.002                                                              | 0.002                          | Lf                | 0.003                          | Mhf               |
| MR07 | 0.036                                                              | 0.023                          | Lf                | 0.045                          | Mhf               |
| MR08 | 0.467                                                              | 0.270                          | Lf                | 0.551                          | Mhf               |
| UR00 | 0.070                                                              | 0.041                          | Lf                | 0.081                          | Mhf               |
| UR01 | 0.003                                                              | 0.002                          | Lf                | 0.005                          | Mhf               |
| UR02 | 0.001                                                              | 0.001                          | Lf                | 0.001                          | Mhf               |
| UR03 | 0.005                                                              | 0.004                          | Lf                | 0.007                          | Mhf               |
| UR04 | 0.001                                                              | 0.001                          | Lf                | 0.002                          | Mhf               |
| UR05 | 0.006                                                              | 0.005                          | Lf                | 0.009                          | Mhf               |

| Site | Highest<br>Threshold<br>Minimum<br>Flow On<br>FDC, Q <sub>80</sub> | Average<br>Flow,<br>March 2016 | Category,<br>2016 | Average<br>Flow, March<br>2020 | Category,<br>2020 |
|------|--------------------------------------------------------------------|--------------------------------|-------------------|--------------------------------|-------------------|
| UR06 | 0.208                                                              | 0.121                          | Lf                | 0.246                          | Mhf               |
| UR07 | 0.001                                                              | 0.001                          | Lf                | 0.002                          | Mhf               |
| UR08 | 0.001                                                              | 0.001                          | Lf                | 0.001                          | Mhf               |

Table S4. Water quality data for 30 locations in 3 major reaches of the Gumara river in March 2020

| S.N. | Site_Name        | Site | Reach | TN    | TP   | NH3-N | NH4+ | NH4+-N | NH3   | PO4-  | PO4--P | DO (Sat%) |
|------|------------------|------|-------|-------|------|-------|------|--------|-------|-------|--------|-----------|
| 1    | Guanta lower     | LR00 | LR    | 7.84  | 0.11 | 0.24  | 0.30 | 0.24   | 0.28  | 0.16  | 0.05   | 126.71    |
| 2    | Kizin lower      | LR01 | LR    | 1.16  | 0.05 | 0.31  | 0.40 | 0.31   | 0.38  | 0.07  | 0.02   | 127.96    |
| 3    | Wonzema lower    | LR02 | LR    | 1.35  | 0.90 | 0.18  | 0.23 | 0.18   | 0.22  | 1.30  | 0.43   | 52.33     |
| 4    | Kizin upper      | LR03 | LR    | 1.31  | 1.66 | 0.14  | 0.19 | 0.15   | 0.17  | 2.41  | 0.80   | 170.01    |
| 5    | Guanta upper     | LR04 | LR    | 1.73  | 0.68 | 0.17  | 0.23 | 0.18   | 0.24  | 0.99  | 0.33   | 162.12    |
| 6    | Gumara bridge    | LR05 | LR    | 1.50  | 0.96 | 0.13  | 0.17 | 0.13   | 0.16  | 0.27  | 0.09   | 157.43    |
| 7    | Shesher 01       | LR06 | LR    | 4.98  | 0.93 | 0.35  | 0.45 | 0.35   | 0.42  | 1.34  | 0.44   | 190.58    |
| 8    | Shesher 02       | LR07 | LR    | 1.78  | 2.78 | 0.17  | 0.23 | 0.18   | 0.21  | 4.15  | 1.37   | 153.8     |
| 9    | Woreta town      | LR08 | LR    | 1.51  | 1.03 | 1.92  | 2.50 | 1.94   | 2.37  | 1.24  | 0.41   | 121.69    |
| 10   | Gumara mouth     | LR09 | LR    | 1.22  | 1.13 | 0.14  | 0.18 | 0.14   | 0.17  | 1.00  | 0.33   | 211.79    |
| 11   | Wanzaye          | LR10 | LR    | 1.47  | 0.40 | 0.28  | 0.36 | 0.28   | 0.34  | 0.58  | 0.19   | 142.01    |
| 12   | Gava             | LR12 | LR    | 1.46  | 0.11 | 0.08  | 0.10 | 0.08   | 0.10  | 0.15  | 0.05   | 151.1     |
| 13   | Fuafuat          | MR00 | MR    | 1.55  | 0.76 | 0.15  | 0.19 | 0.15   | 0.18  | 1.12  | 0.37   | 157.73    |
| 14   | Walbo            | MR01 | MR    | 1.57  | 0.08 | 0.21  | 0.27 | 0.21   | 0.25  | 0.10  | 0.03   | 140.34    |
| 15   | Menekuzer        | MR02 | MR    | 1.19  | 0.17 | 0.64  | 0.82 | 0.63   | 0.78  | 0.24  | 0.08   | 141.15    |
| 16   | Nifara           | MR03 | MR    | 6.50  | 0.08 | 0.19  | 0.24 | 0.19   | 10.79 | 0.11  | 0.04   | 186.09    |
| 17   | Fogeda river     | MR04 | MR    | 1.65  | 0.28 | 0.27  | 0.35 | 0.27   | 0.33  | 0.41  | 0.13   | 120.4     |
| 18   | Ras amba         | MR05 | MR    | 1.38  | 0.09 | 0.12  | 0.15 | 0.12   | 0.14  | 0.13  | 0.04   | 159.85    |
| 19   | Gebetit          | MR06 | MR    | 3.40  | 0.48 | 0.10  | 0.13 | 0.10   | 0.13  | 0.68  | 0.22   | 136.95    |
| 20   | Chan river       | MR07 | MR    | 1.57  | 0.42 | 0.05  | 0.07 | 0.05   | 0.06  | 0.61  | 0.20   | 174.73    |
| 21   | Aba Gunda        | MR08 | MR    | 2.88  | 0.12 | 0.24  | 0.31 | 0.24   | 0.29  | 0.17  | 0.06   | 136.74    |
| 22   | GenaMechawechea  | UR00 | UR    | 2.07  | 1.12 | 0.15  | 0.19 | 0.15   | 0.18  | 10.20 | 3.36   | 131.59    |
| 23   | Sendie meder     | UR01 | UR    | 1.61  | 0.21 | 0.31  | 0.40 | 0.31   | 0.37  | 0.31  | 0.10   | 222.38    |
| 24   | Tosign Ber       | UR02 | UR    | 0.88  | 0.97 | 0.40  | 0.51 | 0.40   | 0.49  | 1.51  | 0.50   | 280.02    |
| 25   | Lewaye           | UR03 | UR    | 1.71  | 1.33 | 0.17  | 0.22 | 0.17   | 0.20  | 1.92  | 0.63   | 192.16    |
| 26   | Debretabor town  | UR04 | UR    | 14.67 | 0.79 | 0.17  | 0.22 | 0.17   | 0.20  | 1.15  | 0.38   | 190.26    |
| 27   | Bilando          | UR05 | UR    | 1.55  | 0.63 | 0.14  | 0.18 | 0.14   | 0.17  | 0.91  | 0.30   | 160.92    |
| 28   | Sensawuha        | UR06 | UR    | 1.63  | 0.76 | 0.18  | 0.24 | 0.19   | 0.22  | 1.10  | 0.36   | 256.42    |
| 29   | Kosterwuha       | UR07 | UR    | 2.00  | 0.39 | 0.30  | 0.38 | 0.30   | 0.36  | 0.57  | 0.19   | 321.05    |
| 30   | Shimagle Giorgis | UR08 | UR    | 3.60  | 0.09 | 0.34  | 0.43 | 0.33   | 0.41  | 0.12  | 0.04   | 153.15    |

Table S5. Water quality status at each sampling site. Location of the sites are given in **Error! Reference source not found.** of the main text. Score values are taken from the research output of Chapman (1996) and Stevenick et al. (2006).

| S.N | SITE | SITE_NAME       | N_SCOR | P_SCOR | DO_SCOR | SU | QUALITY_PHYCHE          |
|-----|------|-----------------|--------|--------|---------|----|-------------------------|
| .   |      |                 | E      | E      | E       | M  | M                       |
| 1   | LR00 | Guanta lower    | 1      | 2      | 3       | 6  | Good, slightly polluted |
| 2   | LR01 | Kizin lower     | 1      | 1      | 3       | 5  | Good, slightly polluted |
| 3   | LR02 | Wonzema lower   | 1      | 3      | 3       | 7  | Good, slightly polluted |
| 4   | LR03 | Kizin upper     | 1      | 3      | 5       | 9  | Moderate, doubtful      |
| 5   | LR04 | Guanta upper    | 1      | 3      | 5       | 9  | Moderate, doubtful      |
| 6   | LR05 | Gumara bridge   | 1      | 2      | 5       | 8  | Moderate, doubtful      |
| 7   | LR06 | Shesher 01      | 1      | 3      | 5       | 9  | Moderate, doubtful      |
| 8   | LR07 | Shesher 02      | 1      | 4      | 5       | 10 | Moderate, doubtful      |
| 9   | LR08 | Woreta town     | 3      | 3      | 3       | 9  | Moderate, doubtful      |
| 10  | LR09 | Gumara mouth    | 1      | 3      | 5       | 9  | Moderate, doubtful      |
| 11  | LR10 | Wanzaye         | 1      | 2      | 4       | 7  | Good, slightly polluted |
| 12  | LR12 | Gava            | 1      | 2      | 5       | 8  | Moderate, doubtful      |
| 13  | MR00 | Fuafuat         | 1      | 3      | 5       | 9  | Moderate, doubtful      |
| 14  | MR01 | Walbo           | 1      | 1      | 4       | 6  | Good, slightly polluted |
| 15  | MR02 | Menekuzer       | 2      | 2      | 4       | 8  | Moderate, doubtful      |
| 16  | MR03 | Nifara          | 1      | 1      | 5       | 7  | Good, slightly polluted |
| 17  | MR04 | Fogeda river    | 1      | 2      | 2       | 5  | Good, slightly polluted |
| 18  | MR05 | Ras amba        | 1      | 1      | 5       | 7  | Good, slightly polluted |
| 19  | MR06 | Gebetit         | 1      | 2      | 4       | 7  | Good, slightly polluted |
| 20  | MR07 | Chan river      | 1      | 2      | 5       | 8  | Moderate, doubtful      |
| 21  | MR08 | Aba Gunda       | 1      | 2      | 4       | 7  | Good, slightly polluted |
| 22  | UR00 | GenaMechawecha  | 1      | 5      | 4       | 10 | Moderate, doubtful      |
| 23  | UR01 | Sendie Meder    | 1      | 2      | 5       | 8  | Moderate, doubtful      |
| 24  | UR02 | Tosign Ber      | 1      | 3      | 5       | 9  | Moderate, doubtful      |
| 25  | UR03 | Lewaye          | 1      | 3      | 5       | 9  | Moderate, doubtful      |
| 26  | UR04 | Debretabor town | 1      | 3      | 5       | 9  | Moderate, doubtful      |
| 27  | UR05 | Bilando         | 1      | 3      | 5       | 9  | Moderate, doubtful      |

|    |      |                  |   |   |   |   |                         |
|----|------|------------------|---|---|---|---|-------------------------|
| 28 | UR06 | Sensawuha        | 1 | 3 | 5 | 9 | Moderate, doubtful      |
| 29 | UR07 | Kosterwuha       | 1 | 2 | 5 | 8 | Moderate, doubtful      |
| 30 | UR08 | Shimagle Giorgis | 1 | 1 | 5 | 7 | Good, slightly polluted |

Table S6. Abundance and community composition of macroinvertebrates sampled in Gumara river in March 2020

| I<br>D | Family             | sit<br>es | Numb<br>er | I<br>D | Family               | sit<br>es | Numb<br>er | I<br>D | Family              | sit<br>es | Numb<br>er |
|--------|--------------------|-----------|------------|--------|----------------------|-----------|------------|--------|---------------------|-----------|------------|
| 1      | Aeshnidae          | 12        | 92         | 1      | Ephemerellid<br>ae   | 21        | 621        | 2      | Notonectida<br>e    | 14        | 131        |
| 2      | Agriidae           | 1         | 1          | 1      | Erpobdellida<br>e    | 1         | 1          | 3      | Oligochaeta         | 5         | 43         |
| 3      | Athericidae        | 3         | 12         | 1      | Gerridae             | 1         | 1          | 3      | Periodidae          | 16        | 104        |
| 4      | Chaoborida<br>e    | 1         | 1          | 1      | Haemopidae           | 1         | 1          | 3      | Philopotami<br>idae | 7         | 80         |
| 5      | Chironomid<br>ae   | 20        | 272        | 1      | Hydaenidae           | 1         | 5          | 3      | Phryganeida<br>e    | 1         | 1          |
| 6      | Coenagriid<br>ae   | 12        | 155        | 2      | Hydrobiidae          | 3         | 8          | 3      | Physidae            | 3         | 10         |
| 7      | Cordulidae         | 1         | 1          | 2      | Hydrometrid<br>ae    | 5         | 9          | 3      | Piscicolidae        | 1         | 1          |
| 8      | Corixidae          | 25        | 390        | 2      | Hydrophilida<br>e    | 1         | 5          | 3      | Planariidae         | 2         | 2          |
| 9      | Culicidae          | 1         | 1          | 2      | Hydropsychi<br>dae   | 9         | 100        | 3      | Planorbidae         | 10        | 79         |
| 10     | Curculionid<br>ae  | 1         | 1          | 2      | Hygrobidae           | 14        | 137        | 3      | Pleidae             | 1         | 1          |
| 11     | Dendrocoeli<br>dae | 4         | 27         | 2      | Lepidostomat<br>idae | 1         | 3          | 3      | Sialidae            | 2         | 3          |
| 12     | Dyropidae          | 1         | 2          | 2      | Libellulidae         | 20        | 196        | 4      | Syrphidae           | 2         | 2          |
| 13     | Dytiscidae         | 3         | 17         | 2      | Naucoridae           | 4         | 70         | 4      | Tabanidae           | 3         | 3          |
| 14     | Ecnomidae          | 1         | 3          | 2      | Nepidae              | 10        | 19         | 4      | Tipulidae           | 1         | 1          |
|        |                    |           |            |        |                      |           |            | 4      | Unionidae           | 6         | 31         |

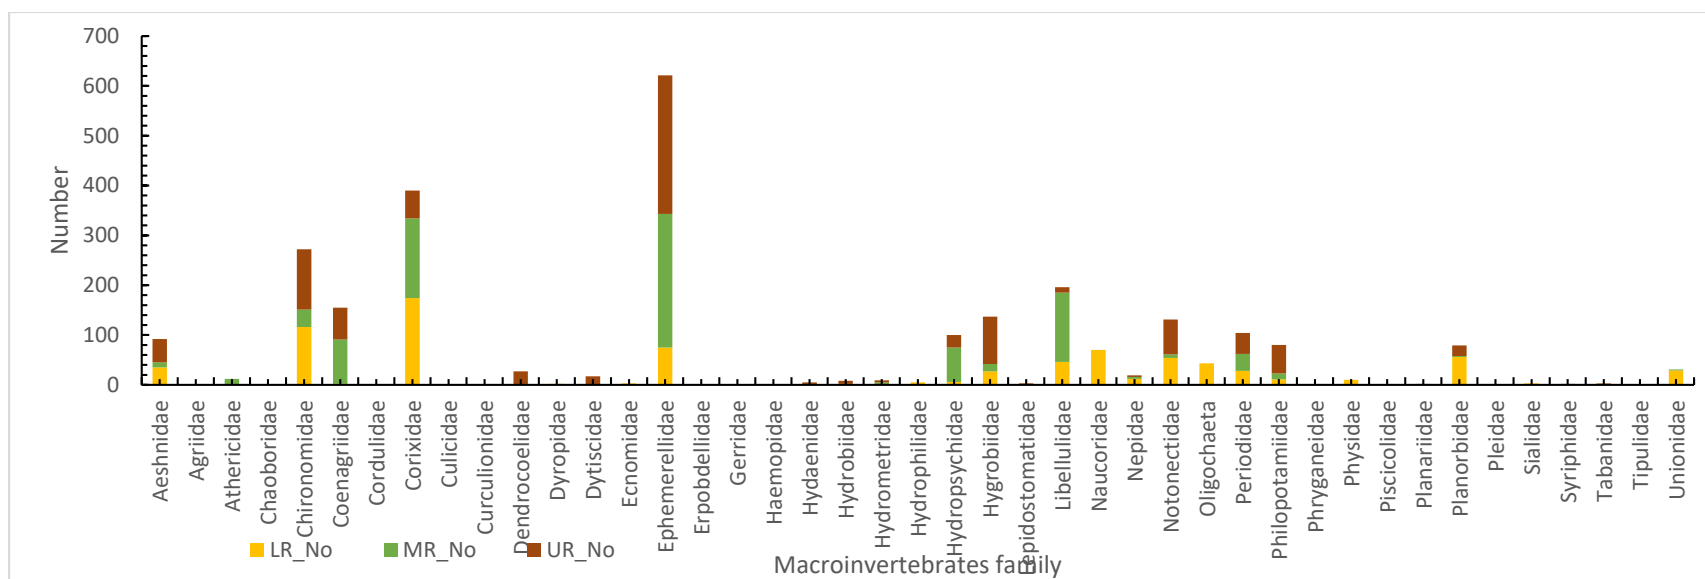

Figure S1. Abundance/number of macroinvertebrate families in the lower, middle and upper reaches of Gumara river

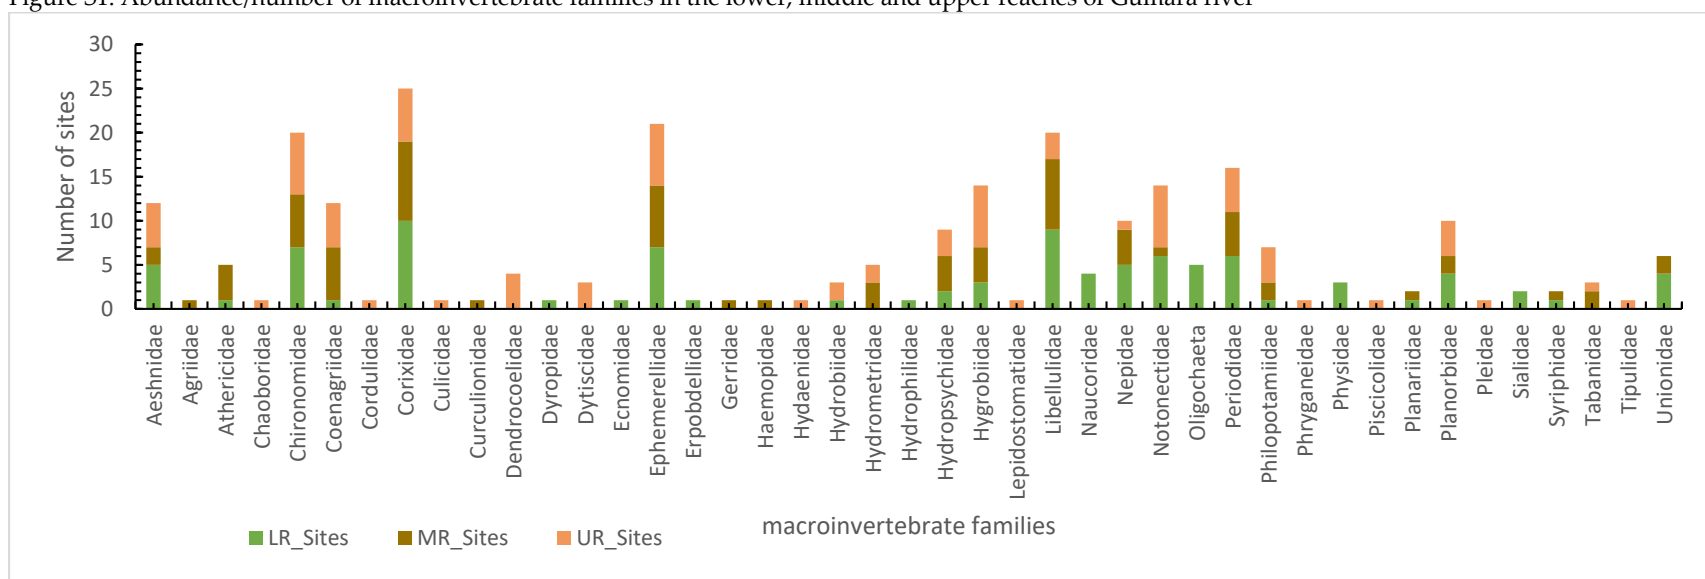

Figure S2. Distribution of macroinvertebrate families sampled in the lower, middle and upper reaches of Gumara river

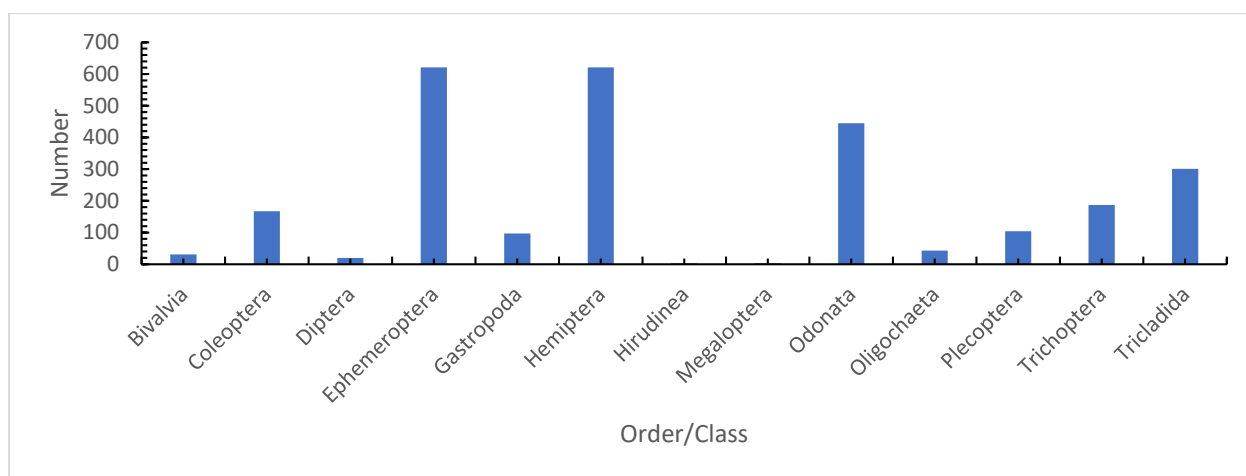

Figure S3. Number of macroinvertebrate orders identified in the Gumara river in March 2020

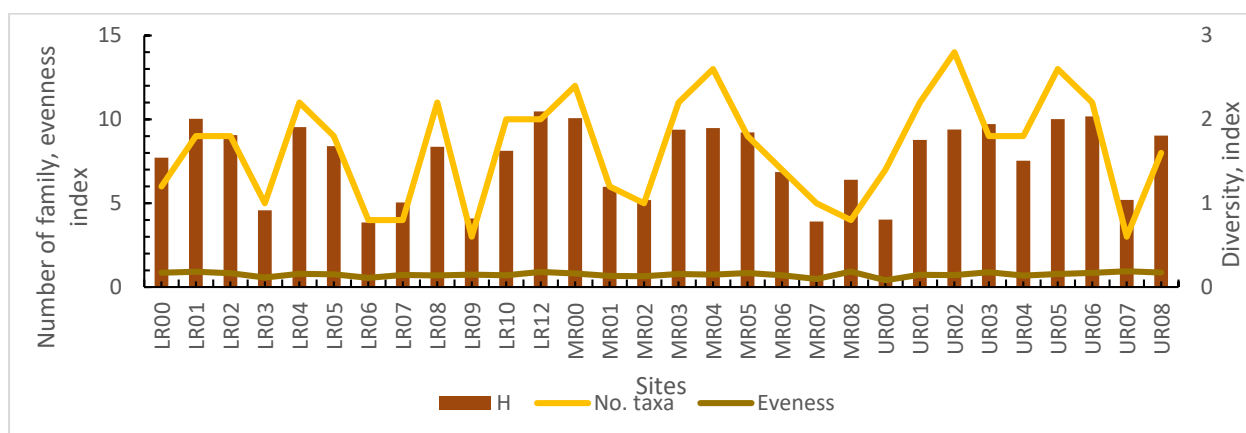

Figure S4. Number Macroinvertebrates of family, diversity (H) and evenness in the Gumara river, March 2020

Table S7. Analysis of Ecological health based on ETHBios macroinvertebrate scoring at each sampling station in Gumara river

| S. N. | SITE CODE | SITE NAME     | TOTAL SCORE | NO. TAXA | AVERAGE ETHBIOS | DESCRIPTION                                                |
|-------|-----------|---------------|-------------|----------|-----------------|------------------------------------------------------------|
| 1     | LR00      | Guanta lower  | 22          | 6        | 3.7             | Poor water quality; major degradation                      |
| 2     | LR01      | Kizin lower   | 33          | 9        | 3.7             | Poor water quality; major degradation                      |
| 3     | LR02      | Wonzema lower | 45          | 9        | 5.0             | Moderate water quality; significant ecological disturbance |
| 4     | LR03      | Kizin upper   | 21          | 5        | 4.2             | Moderate water quality; significant ecological disturbance |
| 5     | LR04      | Guanta upper  | 48          | 11       | 4.4             | Moderate water quality; significant ecological disturbance |
| 6     | LR05      | Gumara bridge | 47          | 9        | 5.2             | Good water quality, slight ecological degradation          |
| 7     | LR06      | Shesher 01    | 18          | 4        | 4.5             | Moderate water quality; significant ecological disturbance |



|    |      |                            |    |    |     |                                                            |
|----|------|----------------------------|----|----|-----|------------------------------------------------------------|
| 8  | LR07 | Shesher 02                 | 12 | 4  | 3.0 | Poor water quality; major degradation                      |
| 9  | LR08 | Woreta town                | 53 | 11 | 4.8 | Moderate water quality; significant ecological disturbance |
| 10 | LR09 | Gumara mouth               | 23 | 3  | 7.7 | High water quality; low level of degradation               |
| 11 | LR10 | Wanzaye                    | 68 | 10 | 6.8 | High water quality; low level of degradation               |
| 12 | LR12 | Gava                       | 60 | 10 | 6.0 | Good water quality, slight ecological degradation          |
| 13 | MR00 | Fuafuat                    | 74 | 12 | 6.2 | Good water quality, slight ecological degradation          |
| 14 | MR01 | Walbo                      | 44 | 6  | 7.3 | High water quality; low level of degradation               |
| 15 | MR02 | Menekuzer                  | 26 | 5  | 5.2 | Good water quality, slight ecological degradation          |
| 16 | MR03 | Nifara                     | 61 | 11 | 5.5 | Good water quality, slight ecological degradation          |
| 17 | MR04 | Fogeda river               | 76 | 13 | 5.8 | Good water quality, slight ecological degradation          |
| 18 | MR05 | Ras amba                   | 41 | 9  | 4.6 | Moderate water quality; significant ecological disturbance |
| 19 | MR06 | Gebetit                    | 33 | 7  | 4.7 | Moderate water quality; significant ecological disturbance |
| 20 | MR07 | Chan river                 | 34 | 5  | 6.8 | High water quality; low level of degradation               |
| 21 | MR08 | Aba Gunda                  | 20 | 4  | 5.0 | Moderate water quality; significant ecological disturbance |
| 22 | UR00 | Gena                       | 31 | 7  | 4.4 | Moderate water quality; significant ecological disturbance |
| 23 | UR01 | Mechaweche<br>Sendie meder | 72 | 11 | 6.5 | High water quality; low level of degradation               |
| 24 | UR02 | Tosign Ber                 | 83 | 14 | 5.9 | Good water quality, slight ecological degradation          |
| 25 | UR03 | Lewaye                     | 47 | 9  | 5.2 | Good water quality, slight ecological degradation          |
| 26 | UR04 | Debretabor<br>town         | 52 | 9  | 5.8 | Good water quality, slight ecological degradation          |
| 27 | UR05 | Bilando                    | 67 | 13 | 5.2 | Good water quality, slight ecological degradation          |
| 28 | UR06 | Sensawuha                  | 68 | 11 | 6.2 | Good water quality, slight ecological degradation          |
| 29 | UR07 | Kosterwuha                 | 21 | 3  | 7.0 | High water quality; low level of degradation               |
| 30 | UR08 | Shimagle<br>Giorgis        | 33 | 8  | 4.1 | Moderate water quality; significant ecological disturbance |

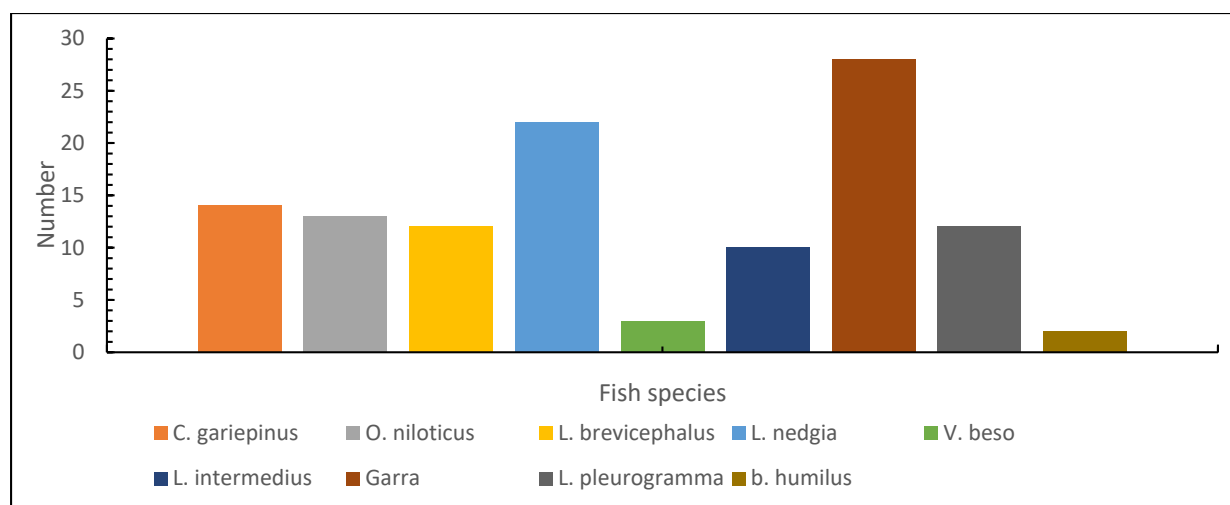

Figure S5. Fish species in the Gumara river and Flood plain wetland in March 2020.

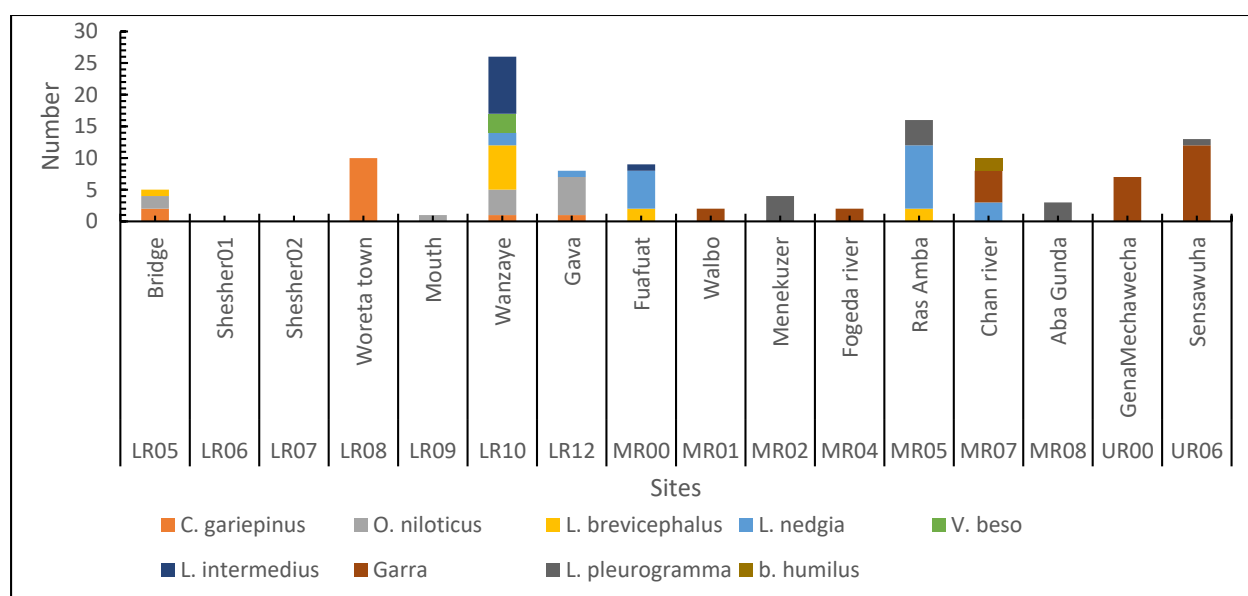

Figure S6. Fish species composition in different reaches of Gumara river and the Flood plain wetland in March 2020

Table S8. Fish species diversity status in Gumara river and wetlands; taking Wanzaye (LR10) as reference site

| S.N. | Site | No. catch | No. spp. | H    | Description | S.N. | Site | No. catch | No. spp. | H    | Description |
|------|------|-----------|----------|------|-------------|------|------|-----------|----------|------|-------------|
| 1    | LR05 | 5         | 3        | 1.05 | Moderate    | 9    | MR01 | 2         | 1        | 0    | Poor        |
| 2    | LR06 | 0         | 0        | 0    | Poor        | 10   | MR02 | 4         | 1        | 0    | Poor        |
| 3    | LR07 | 0         | 0        | 0    | Poor        | 11   | MR04 | 2         | 1        | 0    | Poor        |
| 4    | LR08 | 10        | 1        | 0    | Poor        | 12   | MR05 | 16        | 3        | 0.90 | Moderate    |
| 5    | LR09 | 1         | 1        | 0    | Poor        | 13   | MR07 | 10        | 3        | 1.03 | Moderate    |
| 6    | LR10 | 26        | 6        | 1.58 | Good        | 14   | MR08 | 3         | 1        | 0    | Poor        |
| 7    | LR12 | 8         | 3        | 0.74 | Moderate    | 15   | UR00 | 7         | 1        | 0    | Poor        |
| 8    | MR00 | 9         | 3        | 0.85 | Moderate    | 16   | UR06 | 13        | 2        | 0.27 | Poor        |

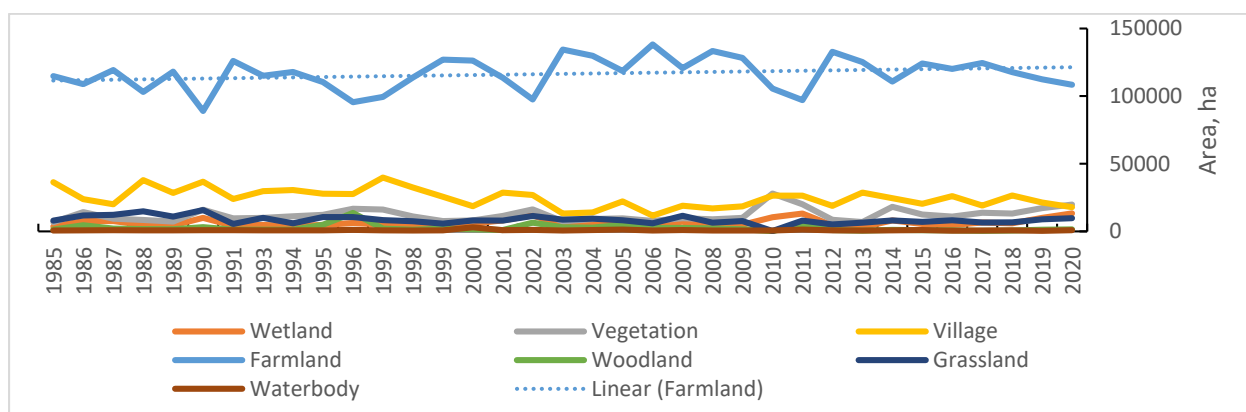

Figure S7. Time series of land use and land cover of Gumara river watershed between 1985-2020

Table S9. Riparian tree species in the Gumara river

| S. N. | LOCAL NAME     | SCIENTIFIC NAMES                                         | INDICATION/BENEFIT (AMHARIC/ENGLISH)                       |
|-------|----------------|----------------------------------------------------------|------------------------------------------------------------|
| 1     | Shola          | <i>Ficus sycomorus</i>                                   | fruit edible, ecological importance - shade for birds      |
| 2     | Kulkual        | <i>Euphorbia abyssinica</i>                              | edible, fruit for human and leaves for livestock           |
| 3     | Saba           | Unidentified                                             | Ecological importance being ever green                     |
| 4     | Agam           | <i>Carissa spinarum</i>                                  | food and medicinal plant                                   |
| 5     | Lankuso        | <i>Dracaena steudneri</i>                                | construction, rope making                                  |
| 6     | Sensel/ Simiza | <i>Justicia schimperiana</i>                             | fuelwood, fencing                                          |
| 7     | Kega           | <i>Rosa abyssinica</i>                                   | edible fruit, fencing                                      |
| 8     | Abalo          | <i>Terminalia brownii</i>                                | food smoking, charcoal                                     |
| 9     | Bisana         | <i>Croton macrostachyus</i>                              | farm shed, medicinal for treating fungus, farm tools       |
| 10    | Enqoqo         | <i>Embelia schimperii</i>                                | medicine for tape worm, leaves for pesticide               |
| 11    | Endawula       | <i>Kalanchoe laciniata</i>                               | medicine for inflammation                                  |
| 12    | Donga          | <i>Apodytes dimidiata</i>                                | lumber                                                     |
| 13    | Decurrens      | <i>Acacia decurrens</i>                                  | exotic, charcoal, fuelwood, soil fertility                 |
| 14    | Bahir zaf      | <i>Eucalyptus camaldulensis</i> , and <i>E. globulus</i> | exotic, construction, fuelwood, medicine-for cough         |
| 15    | Gumero         | <i>Acacia bussei</i>                                     | fuelwood, fencing                                          |
| 16    | Shembeko       | <i>Arundo donax</i>                                      | thatching and fencing, musical instrument-'washint'        |
| 17    | Banba          | <i>Ficus sur</i>                                         | ecological importance, livestock-shed, birds-shed          |
| 18    | Enzert         | Unidentified                                             | Fuelwood, ecologically important                           |
| 19    | Sehel          | Unidentified                                             | Fuelwood, fence, construction                              |
| 20    | Kechem/ qacama | <i>Myrsine africana</i>                                  | Serve as medicinal purpose for treating intestinal problem |
| 21    | Zigba          | <i>Podocarpus falcatus</i>                               | lumber, fuelwood                                           |
| 22    | Wulkifa        | <i>Dombeya torrida</i>                                   | Fuelwood, charcoal                                         |
| 23    | Dingayseber    | <i>Pavetta abyssinica</i>                                | Root used for poison for crop pests                        |
| 24    | Lol            | <i>Ekebergia capensis</i>                                | Furniture                                                  |

| S. N. | LOCAL NAME          | SCIENTIFIC NAMES                                       | INDICATION/BENEFIT (AMHARIC/ENGLISH)                                     |
|-------|---------------------|--------------------------------------------------------|--------------------------------------------------------------------------|
| 25    | Koma                | <i>Prunus Africana</i>                                 | medicine for fungal and bacterial infection                              |
| 26    | Mech                | <i>Guizotia scabra</i>                                 | Medicine for epilepsy                                                    |
| 27    | Kosheshila          | <i>Acanthus sennii</i>                                 | medicine for tape worm                                                   |
| 28    | Atat                | <i>Maytenus arbutifolia</i>                            | Planted as a fence                                                       |
| 29    | Jejeba              | <i>Berchemia discolor</i>                              | food and feed, dye for basket                                            |
| 30    | Yewusha milas       | <i>Rumex nepalensis</i>                                | Medicine for treating febrile illness                                    |
| 31    | Girawa              | <i>Vernonia amygdalina</i>                             | Medicine for treating bladder distention                                 |
| 32    | Woiyra              | <i>Olea africana</i>                                   | Fuelwood, pole, teeth cleaner/brushing                                   |
| 33    | Atquar/ Tikur anfar | <i>Buddleja davidii</i>                                | For creating fire by rubbing                                             |
| 34    | Zik                 | Unidentified                                           | Fuelwood, ecologically important                                         |
| 35    | Azo hareg           | <i>Clematis longicauda</i> ,<br>and <i>C. simensis</i> | Fresh leaves are squeezed on wound; and Hemorrhoids, skin cancer, Eczema |
| 36    | Tid                 | <i>Juniperus procera</i> L.                            | lumber, fuelwood                                                         |
| 37    | Wanza               | <i>Cordia africana</i>                                 | lumber, fuelwood, animal shade                                           |
| 38    | Sesa                | <i>Albizia gummifera</i>                               | Coffee-shed, leaves for banana ripening, holes on wood for bees' habitat |

Table S10. Medicinal plants identified in the Gumara and associated rivers of lake tana Sub-basin

| S. N. | LOCAL NAME          | SCIENTIFIC NAME                | INDICATION/BENEFIT (AMHARIC/ENGLISH)                                |
|-------|---------------------|--------------------------------|---------------------------------------------------------------------|
| 1     | Agam                | <i>Carissa spinarum</i>        | Used for protecting against 'Buda'/evil eye                         |
| 2     | Ameraro             | <i>Discopodium penninervum</i> | large leaves for baking bread                                       |
| 3     | Aregresa,           | <i>Zehneria scabra</i>         | headache, cough/flu                                                 |
| 4     | Astenager           | <i>Datura stramonium</i>       | Fufu or quaqucha/skin fungus, anti-malaria                          |
| 5     | Yeayit areg,        | <i>Stephania abyssinica</i>    | Lekumegna/ Evil eye – livestock bleeding skin                       |
| 6     | Chegegit/ Shimgigit | <i>Cynoglossum coeruleum</i>   | gereft/pneumonia                                                    |
| 7     | Chifreg             | <i>Sida tenuicarpa</i>         | cleaning teeth                                                      |
| 8     | Chikugn,            | <i>Artemisia abyssinica</i>    | Buda/evil eye, stomach ache/intestinal problem                      |
| 9     | Damakessie          | <i>Ocimum grattissimum</i>     | pneumonia, cough/flu                                                |
| 10    | Enquay              | <i>Ximenia americana</i>       | Edible fruit                                                        |
| 11    | Gid-zemedede        | Unidentified                   | Shihola/ livestock intestinal ache                                  |
| 12    | Guticha Abeba       | <i>Acmella caulirhiza</i> Del. | sore throat, boils, tooth ache                                      |
| 13    | Yejib-shinkurt      | <i>Crinum abyssinicum</i>      | Buda/evil eye, pneumonia                                            |
| 14    | Qotetina            | <i>Verbascum sinaiticum</i>    | kumegna/bloody stool, anti-pain, for cleaning crop threshing ground |
| 15    | Kulkual             | <i>Euphorbia abyssinica</i>    | Sore; edible, fruit for human and leaves for livestock              |

|    |                    |                                      |                                                |
|----|--------------------|--------------------------------------|------------------------------------------------|
| 16 | Misana             | <i>Croton<br/>macrostachyus</i>      | Cattle nifat/bloating, lenekersa/cancer        |
| 17 | Simiza,            | <i>Justicia<br/>schimperiana</i>     | Sanitazation, utensil cleaning                 |
| 18 | Tenadam            | <i>Ruta chalepensis L.</i>           | buda/ evil eye, abdominal pain                 |
| 19 | Tobia              | <i>Englerina woodfordi<br/>oides</i> | Sore treatment, Cutaneous leishmaniasis        |
| 20 | Tunjit,            | <i>Otostegia<br/>integrifolia</i>    | Flies and mosquitoes, expels evil spirits      |
| 21 | Yaheya shoh        | <i>Argemone mexicana<br/>L.</i>      | Feed, poultice for inflamed skin               |
| 22 | yemeder<br>embuaye | <i>Solanum<br/>incanum L.</i>        | Kebet wogi/ Attention deficient disorder       |
| 23 | yemerz-zaf         | Unidentified                         | Anti-poison, fuelwood                          |
| 24 | Yeset kest         | <i>Asparagus africanus</i>           | cattle lekumegna/bloody stool and skin problem |
| 25 | Nech Bahir zaf     | <i>Eucalyptus globulus</i>           | Cough/flu                                      |

---

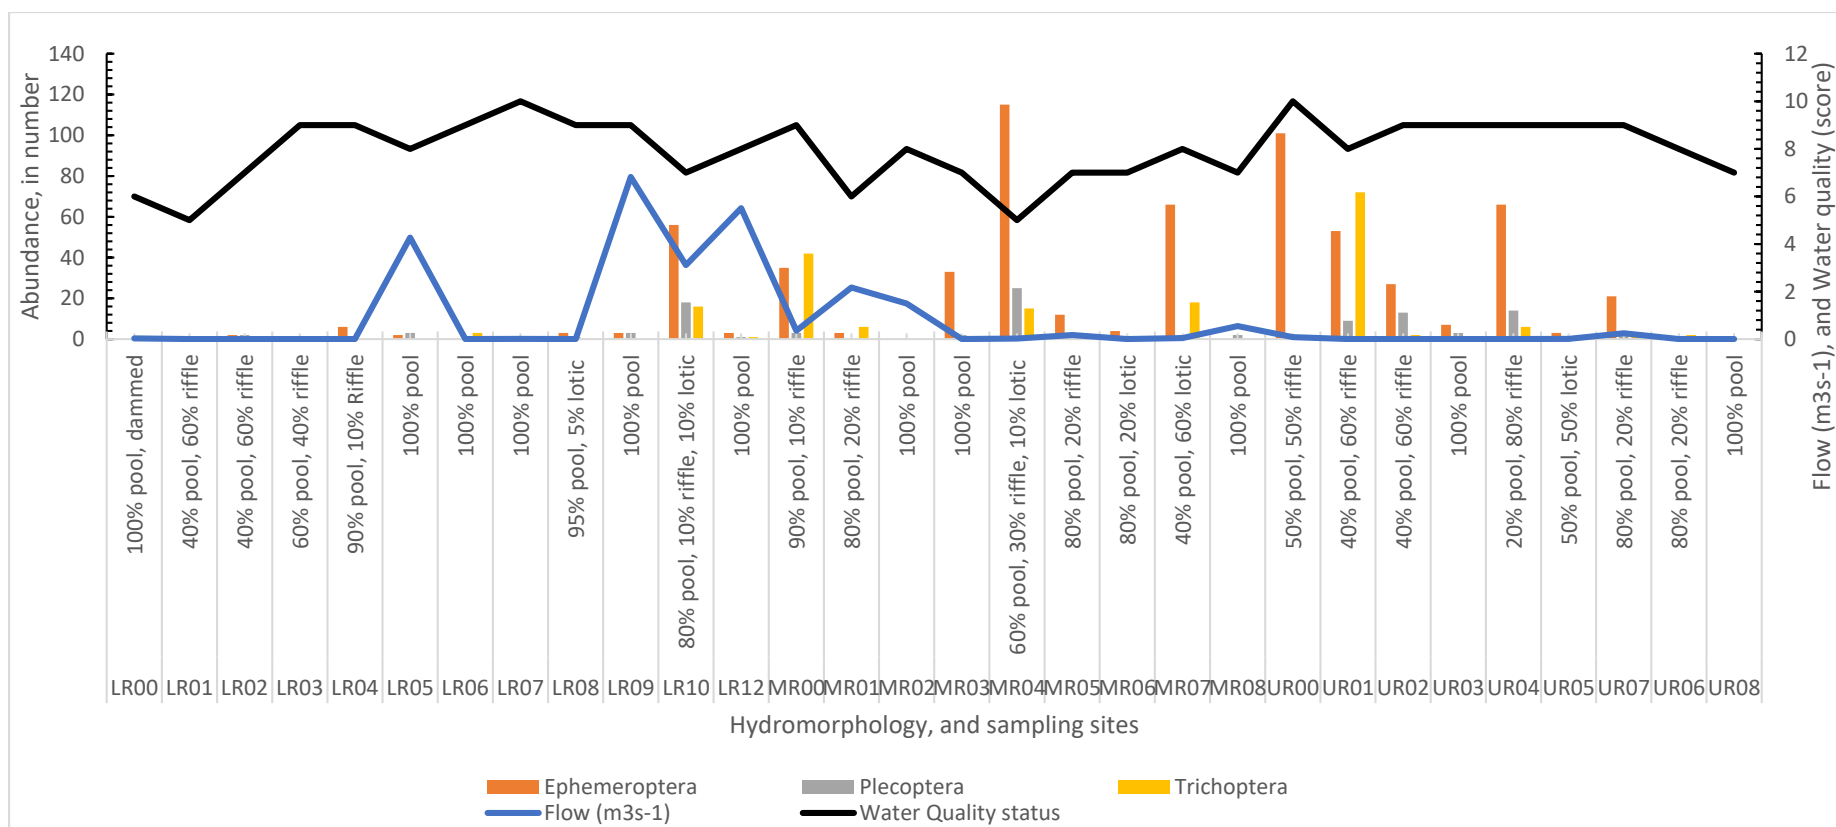

Figure S8. EPT abundance and water quality status (score) in different Hydromorphic proportion of sampling site
